# Supplementary material for: Intermolecular-Type Conical Intersections in Benzene Dimer
Source: MDPI journal article supplement (doi:10.3390/ijms24032906), 2023-02-02
Supplement: s1 [file s1]

# Supplementary Materials: Intermolecular-type conical intersections in benzene dimer

Attila Bende <sup>1,\*</sup>  and Alex-Adrian Farcaş <sup>1,</sup> 

## L1: Geometry structures:

Structure name :  $R_e(S_0)$   
Method : DFT ( $\omega$ B97X-D3/ma-def2-TZVPP)

24

|   |                   |                   |                   |
|---|-------------------|-------------------|-------------------|
| C | 0.16755025682620  | 0.15803578810550  | -0.38459061997770 |
| C | 1.51321766139978  | 0.01079268527048  | -0.68819018423892 |
| C | 2.28047103304959  | 1.12399429819786  | -0.99722345909495 |
| C | 1.70115805111480  | 2.38501349554715  | -1.00741234610902 |
| C | 0.35512893389640  | 2.53099563530205  | -0.70738639823690 |
| C | -0.41130131535660 | 1.41779131257521  | -0.39464913236115 |
| H | -0.42863917334644 | -0.70863260625668 | -0.12874159861690 |
| H | 1.96642113310338  | -0.97265667319859 | -0.67802529543420 |
| H | 3.33173352859505  | 1.00882305179108  | -1.23032029448633 |
| H | 2.30011591162734  | 3.25417567180729  | -1.24928066232854 |
| H | -0.09724090928484 | 3.51476439355759  | -0.70986578842554 |
| H | -1.45849251299371 | 1.53424212385561  | -0.14647668891147 |
| C | -0.37836887395182 | 0.42410237858500  | 3.39121431458521  |
| C | 0.97086834518298  | 0.28852463665143  | 3.10032523877149  |
| C | 1.73056191978806  | 1.40726198887051  | 2.79156421374091  |
| C | 1.14126785009880  | 2.66224355193723  | 2.77723504533895  |
| C | -0.20781496672770 | 2.79899849048810  | 3.07010073990427  |
| C | -0.96836833266284 | 1.67996784217166  | 3.37485584243150  |
| H | -0.97191969076266 | -0.45004074415075 | 3.62845879719222  |
| H | 1.42984961683168  | -0.69217849529421 | 3.10617452433948  |
| H | 2.78031915756564  | 1.29971744601705  | 2.55039706645812  |
| H | 1.73272725557698  | 3.53403552633335  | 2.52779903303920  |
| H | -0.66785575279843 | 3.77920403316131  | 3.05506285112859  |
| H | -2.02247912677167 | 1.78576416867477  | 3.59932480129168  |

Structure name :  $R_e^{CAo}(S_0)$   
Method : DFT ( $\omega$ B97X-D3/ma-def2-TZVPP)

24

|   |                   |                   |                   |
|---|-------------------|-------------------|-------------------|
| C | 0.36464760085564  | 0.25709494423586  | 0.35338463452549  |
| C | 1.86863920585243  | 0.28983980309898  | -0.03363782207107 |
| C | 2.27200194631667  | 1.51795097569305  | -0.79029133175789 |
| C | 1.38313929258104  | 2.36224996919631  | -1.30633809788770 |
| C | -0.06214603163764 | 2.15712852981624  | -1.15272133006938 |
| C | -0.54645867132677 | 1.17804023992195  | -0.39358407812151 |
| H | -0.02369742271804 | -0.76168680439294 | 0.31415763835586  |
| H | 2.22710920541987  | -0.58908996576593 | -0.57675289929900 |
| H | 3.33246483768361  | 1.68848569314746  | -0.93756250772157 |
| H | 1.71921244459674  | 3.22442377216316  | -1.86935780289960 |

---

|   |                   |                   |                   |
|---|-------------------|-------------------|-------------------|
| H | -0.73313091000219 | 2.82424893116364  | -1.68005558080004 |
| H | -1.61693674275895 | 1.04012942672144  | -0.29000919720837 |
| C | 0.74838227961066  | 0.60367889161557  | 1.82814702202831  |
| C | 2.22522194244262  | 0.25771274398299  | 1.48860973004525  |
| C | 3.27450009864166  | 1.18811284446720  | 2.00679592626981  |
| C | 2.95337600093569  | 2.38555435201422  | 2.48900322309763  |
| C | 1.55729053438578  | 2.83326508485694  | 2.55539527469454  |
| C | 0.54509159129731  | 2.02643874700255  | 2.24980692468655  |
| H | 0.27358490334163  | -0.05304820801413 | 2.56237006613297  |
| H | 2.46077446245239  | -0.76732343189059 | 1.77850111792928  |
| H | 4.31054552217546  | 0.87087910579154  | 1.96623491590172  |
| H | 3.72441535736867  | 3.05656581009621  | 2.84743460036542  |
| H | 1.36067590404949  | 3.84900465165916  | 2.87584618369861  |
| H | -0.47566335156387 | 2.38357389341903  | 2.32639339010466  |

---

Structure name :  $R_e^{CAa}(S_0)$   
Method : DFT ( $\omega$ B97X-D3/ma-def2-TZVPP)

24

|   |                   |                   |                   |
|---|-------------------|-------------------|-------------------|
| C | 0.62349266032939  | 1.04848048820938  | 0.45221050850223  |
| C | 1.98551547668296  | 0.95170452076915  | -0.28909537605197 |
| C | 1.92035972686812  | 1.37815836893285  | -1.72252114470336 |
| C | 0.76778073882353  | 1.58249474687725  | -2.35678288456268 |
| C | -0.52734224529367 | 1.38687551138570  | -1.69401749392035 |
| C | -0.60542214953929 | 1.11435081379201  | -0.39309877633831 |
| H | 0.53501418130170  | 0.27256255923848  | 1.21331849466634  |
| H | 2.48814990025958  | -0.01756203060718 | -0.21555737621273 |
| H | 2.86225323789522  | 1.49891321921555  | -2.24782941770557 |
| H | 0.76906811074960  | 1.87908442686991  | -3.39868284800141 |
| H | -1.42621542016544 | 1.45897504771047  | -2.29402547153635 |
| H | -1.56856425771064 | 0.96325639953332  | 0.08120780024997  |
| C | 1.11166546628294  | 2.37550814676019  | 1.11500583574695  |
| C | 2.56057191108348  | 2.02782501295336  | 0.67375178827746  |
| C | 3.40700986935255  | 1.47433000579984  | 1.77667051212875  |
| C | 3.02992262863145  | 1.50494214109049  | 3.05309144867269  |
| C | 1.75863009943133  | 2.10764681721037  | 3.47172212608351  |
| C | 0.86954494984773  | 2.53896130471013  | 2.57946828544307  |
| H | 0.72454212520923  | 3.22740437824639  | 0.55512633934242  |
| H | 3.09786299465900  | 2.83301031054645  | 0.16337942799260  |
| H | 4.36830619443964  | 1.05343135951333  | 1.50001856779974  |
| H | 3.68118443305567  | 1.10108876260381  | 3.81875521199738  |
| H | 1.56370289130222  | 2.20608367794179  | 4.53258155174600  |
| H | -0.06045352349631 | 2.99173401069695  | 2.90419289038361  |

---

Structure name :  $R_e(S_1)$   
Method : TDDFT ( $\omega$ B97X-D3/ma-def2-TZVPP)

24

|   |                  |                  |                   |
|---|------------------|------------------|-------------------|
| C | 0.16622940899554 | 0.17630213654732 | -0.33841170731140 |
| C | 1.52937251001468 | 0.02668323359299 | -0.62351120592893 |

---

|   |                   |                   |                   |
|---|-------------------|-------------------|-------------------|
| C | 2.30580100460586  | 1.14812544154930  | -0.94355006957887 |
| C | 1.71949508625313  | 2.41985033112146  | -0.97155085014310 |
| C | 0.35726155342980  | 2.56966666333839  | -0.68274737853937 |
| C | -0.41869166383757 | 1.44897251203894  | -0.36076423665417 |
| H | -0.43324331265816 | -0.69090754818253 | -0.09669971037958 |
| H | 1.97879860508356  | -0.95699585946752 | -0.60883424046735 |
| H | 3.35996451064180  | 1.03454796904632  | -1.15755599754154 |
| H | 2.31927655764841  | 3.28842861941345  | -1.20829503783134 |
| H | -0.09069021333284 | 3.55424249460922  | -0.69394590867408 |
| H | -1.46715334339926 | 1.56728763583715  | -0.12268759316184 |
| C | 0.81620156664441  | 0.58804197784603  | 2.63759318469234  |
| C | 2.17938602549572  | 0.43513975258483  | 2.35570204391666  |
| C | 2.95926386063114  | 1.55410913767761  | 2.03716099257123  |
| C | 2.37534652269422  | 2.82710603490417  | 2.00264197271154  |
| C | 1.00912429909391  | 2.97842179155463  | 2.27200216682489  |
| C | 0.22917424025855  | 1.85892686508372  | 2.59054911940788  |
| H | 0.21468704274542  | -0.27828277142094 | 2.87826062310655  |
| H | 2.62671770800288  | -0.54955001087090 | 2.37664305375215  |
| H | 4.01065756814541  | 1.43469366404002  | 1.81299809399448  |
| H | 2.97757547818380  | 3.69300250478732  | 1.76302925732764  |
| H | 0.55843007971822  | 3.96109200118884  | 2.23975078617623  |
| H | -0.82699509505881 | 1.97431542318001  | 2.79334264172987  |

---

Structure name : CI<sub>M</sub>(I)

Method : Spin-Flipped TDDFT ( $\omega$ B97X-D3/ma-def2-TZVPP)

24

|   |                   |                   |                   |
|---|-------------------|-------------------|-------------------|
| C | 0.00596198687068  | 0.01481339486688  | 0.01355896097355  |
| C | 1.45983752665012  | 0.02133601227033  | 0.01357228331248  |
| C | 2.24008024689950  | 1.23128669976950  | 0.01195823290366  |
| C | 1.75715985649155  | 1.15253338234636  | -1.34267965242936 |
| C | 0.38402043583304  | 1.45444172450415  | -1.71335933562192 |
| C | -0.56953759483572 | 0.88011007196045  | -0.89487572193644 |
| H | -0.54288621609919 | -0.65520048976291 | 0.66000819615705  |
| H | 1.97371428192024  | -0.91808252676084 | 0.21193152962639  |
| H | -1.63157368374774 | 1.05685122418778  | -0.97671163150983 |
| H | 0.16739422189068  | 2.04011761149615  | -2.59590564067453 |
| H | 3.30108110830546  | 1.19506776163872  | 0.21654591475747  |
| H | 2.48898590347725  | 1.04891652486912  | -2.14228461881915 |
| C | -2.48236376881904 | 2.27498050085674  | 2.05627642258635  |
| C | -1.34277893413780 | 1.98112836289731  | 2.79223449576070  |
| C | -2.44727984416542 | 3.27455036562633  | 1.09529162269198  |
| C | -0.16961700120288 | 2.68495662521633  | 2.56602711283854  |
| C | -1.27198157866521 | 3.97685709001412  | 0.86771892853012  |
| C | -0.13362717519947 | 3.68189445354862  | 1.60224269085277  |
| H | -3.39738568607924 | 1.72246165605456  | 2.23085895094886  |
| H | -1.36869689201318 | 1.19824088158781  | 3.54017906007993  |
| H | -3.33509902394590 | 3.50372983616035  | 0.51867645010188  |
| H | -1.24189777821572 | 4.75072539983340  | 0.11087612394217  |
| H | 0.72314272904434  | 2.44971559217275  | 3.13094110868747  |
| H | 0.78813478905583  | 4.21670952766117  | 1.41449691630325  |

---

Structure name :  $\text{Cl}_M(\text{II})$   
 Method : Spin-Flipped TDDFT ( $\omega\text{B97X-D3/ma-def2-TZVPP}$ )

24

|   |                   |                   |                   |
|---|-------------------|-------------------|-------------------|
| C | -0.00007916868423 | -0.00206546527766 | 0.00137089805298  |
| C | 1.45817086966759  | -0.00165524047606 | 0.00196986547458  |
| C | 2.24364699504036  | 1.20224851014770  | 0.00303015689612  |
| C | 1.76005634853262  | 1.13214350959778  | -1.35183087908222 |
| C | 0.39011030778902  | 1.44870864474089  | -1.71209928262231 |
| C | -0.56911821881030 | 0.87668680733120  | -0.89428831764456 |
| H | -0.55118657202270 | -0.69601117624334 | 0.62063818887562  |
| H | 1.96684897654164  | -0.94402930935660 | 0.19702675700233  |
| H | -1.63145107651801 | 1.04455851735180  | -0.99248974689819 |
| H | 0.17538896310631  | 2.03788043773317  | -2.59268338936055 |
| H | 3.30465217647777  | 1.15770683937013  | 0.20633117313216  |
| H | 2.48522459376820  | 1.02576829323144  | -2.15709027196592 |
| C | -1.97081940511812 | -1.85265232680383 | -3.10604140772480 |
| C | -1.00036032198164 | -2.55990586753644 | -2.41152022039325 |
| C | -1.60353823742479 | -1.00573055560802 | -4.14174377834211 |
| C | 0.33678726887378  | -2.42076124639072 | -2.75295606121374 |
| C | -0.26607497885486 | -0.86730798326312 | -4.48327830053984 |
| C | 0.70416812596328  | -1.57430350413904 | -3.78802643681597 |
| H | -3.01451363757669 | -1.95976518370150 | -2.83820324716375 |
| H | -1.28648271572929 | -3.21763489088536 | -1.60031445110005 |
| H | -2.36055099602540 | -0.45232897086943 | -4.68335934668984 |
| H | 0.02139870839147  | -0.20740096348782 | -5.29236053206173 |
| H | 1.09492646906215  | -2.97045172084805 | -2.20941961350811 |
| H | 1.74830962679293  | -1.46475273424659 | -4.05282008381879 |

Structure name :  $\text{Cl}_D(\text{I})$   
 Method : Spin-Flipped TDDFT ( $\omega\text{B97X-D3/ma-def2-TZVPP}$ )

24

|   |                   |                   |                   |
|---|-------------------|-------------------|-------------------|
| C | 0.000000000000000 | 0.000000000000000 | 0.000000000000000 |
| C | 1.36340728835100  | 0.000000000000000 | 0.000000000000000 |
| C | 2.13006891675498  | 1.22952755365549  | 0.000000000000000 |
| C | 1.28706450040853  | 2.45907980493519  | -0.05582543810145 |
| C | -0.10442913447795 | 2.38684789237767  | -0.18948865847330 |
| C | -0.76628741758924 | 1.19097442523719  | -0.07970146991832 |
| H | -0.51709276861129 | -0.95277293974291 | 0.01221386158665  |
| H | 1.89648081742982  | -0.94170189425762 | -0.00771830436942 |
| H | 3.02003533117809  | 1.21171139055230  | -0.62942189561609 |
| H | 1.78570774448894  | 3.38659067090957  | -0.31073482564585 |
| H | -0.66033407718539 | 3.31028701932341  | -0.30479770510427 |
| H | -1.84498672390497 | 1.14162980860596  | -0.12572580137826 |
| C | 2.21659457320089  | -0.18921053141712 | 3.04606305699835  |
| C | 3.20602291073909  | 0.40710182725281  | 2.32959473102381  |
| C | 2.94157242742521  | 1.61585411679398  | 1.60977618617251  |
| C | 1.75547904345950  | 2.42310396812768  | 1.99511312909028  |
| C | 0.77724822376597  | 1.77545499320632  | 2.79069896018293  |
| C | 0.98152511978734  | 0.49859060715682  | 3.24063804311379  |
| H | 2.36793535591452  | -1.15412446953527 | 3.51040869508410  |

---

|   |                   |                   |                  |
|---|-------------------|-------------------|------------------|
| H | 4.15845592410407  | -0.08785713919771 | 2.18445224218314 |
| H | 3.80822917908783  | 2.19082646120967  | 1.29972018323869 |
| H | 1.82698002253890  | 3.50194363013243  | 2.03627449765691 |
| H | -0.12920321994404 | 2.30302995895289  | 3.05556796605726 |
| H | 0.20889559729960  | 0.02283690401248  | 3.83264263554284 |

---

Structure name :  $\text{Cl}_D(\text{II})$   
Method : Spin-Flipped TDDFT ( $\omega\text{B97X-D3/ma-def2-TZVPP}$ )

24

|   |                   |                   |                   |
|---|-------------------|-------------------|-------------------|
| C | 0.00005190330919  | 0.00007491260228  | 0.00026109390845  |
| C | 1.40605404235885  | 0.00008614283218  | 0.00004194268944  |
| C | 2.13278181747219  | 1.29165288475398  | -0.00015600864045 |
| C | 1.59249725506510  | 1.56605990689099  | -1.34929395909115 |
| C | 0.20894811250938  | 1.76080073128865  | -1.51389124785649 |
| C | -0.64534408016339 | 1.04036314843342  | -0.67580786663911 |
| H | -0.54642274289843 | -0.83719314063071 | 0.41603959080334  |
| H | 1.97293096383414  | -0.91853365790680 | 0.08930874621700  |
| H | 2.28185306996173  | 1.70945980235651  | -2.17289574654743 |
| H | -0.16879913580163 | 2.36502458775208  | -2.32941343230993 |
| H | 1.76934995311274  | 2.32054257515940  | 1.14885355356775  |
| H | 2.20189298494381  | 1.79695094754068  | 2.46631345404630  |
| C | 3.07904157792147  | 2.46113619736838  | 3.26452461277872  |
| C | 3.60679451607582  | 3.71132669829838  | 2.88816244511445  |
| C | 3.20905690736491  | 4.28860948224141  | 1.66578697239845  |
| C | 2.33487297848508  | 3.65519833858936  | 0.84224685859376  |
| C | 1.81086602565433  | 0.83343943411630  | 2.77261227023729  |
| C | 4.30913696864838  | 4.22514579889950  | 3.52995787309765  |
| H | -1.71907633320397 | 1.15643269324912  | -0.68711272889699 |
| H | 2.04373398911238  | 4.11058279549397  | -0.09713398872124 |
| H | 3.60879189557837  | 5.25495343758804  | 1.38248706488184  |
| H | 3.37845382571071  | 2.02358887410323  | 4.20957279757088  |
| H | 0.66884571250100  | 2.36431199390176  | 1.10124748234944  |
| H | 3.21040118739265  | 1.14845030174534  | -0.01923878865173 |

---

Structure name :  $\text{Cl}_D(60^\circ)$   
Method : Spin-Flipped TDDFT ( $\omega\text{B97X-D3/ma-def2-TZVPP}$ )

24

|   |           |           |           |
|---|-----------|-----------|-----------|
| C | 0.000000  | 0.000000  | 0.000000  |
| C | 1.415415  | 0.000000  | 0.000000  |
| C | 2.157884  | 1.291137  | 0.000000  |
| C | 1.337057  | 2.467924  | 0.020636  |
| C | -0.023338 | 2.389635  | 0.164697  |
| C | -0.718494 | 1.153757  | 0.173458  |
| H | -0.511441 | -0.953456 | -0.069694 |
| H | 1.941574  | -0.872275 | -0.364170 |
| H | 3.060097  | 1.350001  | -0.598919 |
| H | 1.815118  | 3.435797  | -0.067248 |
| H | -0.595991 | 3.309206  | 0.206136  |
| H | -1.797499 | 1.136786  | 0.234005  |

---

|   |          |           |          |
|---|----------|-----------|----------|
| C | 2.963878 | 0.994547  | 1.728445 |
| C | 4.300342 | 0.534753  | 1.594354 |
| C | 4.621319 | -0.794381 | 1.663177 |
| C | 3.635295 | -1.727206 | 2.088643 |
| C | 2.338080 | -1.357463 | 2.290727 |
| C | 1.921681 | -0.033527 | 1.952022 |
| H | 2.824438 | 1.961066  | 2.198362 |
| H | 5.078376 | 1.266420  | 1.406606 |
| H | 5.638792 | -1.124891 | 1.505261 |
| H | 3.935444 | -2.748917 | 2.288889 |
| H | 1.605210 | -2.073645 | 2.638843 |
| H | 0.958536 | 0.317755  | 2.299287 |

---

Structure name :  $\text{Cl}_D(100^\circ)$   
Method : Spin-Flipped TDDFT ( $\omega\text{B97X-D3/ma-def2-TZVPP}$ )

24

|   |                   |                   |                   |
|---|-------------------|-------------------|-------------------|
| C | 0.00000001138510  | -0.00000000713253 | 0.00000000301917  |
| C | 1.36551251444876  | -0.00000000013331 | -0.00000000324675 |
| C | 2.25065738778407  | 1.16669274460386  | -0.00000000459957 |
| C | 1.32936446717755  | 2.39569079860773  | -0.12322170389376 |
| C | -0.07305326764585 | 2.33566926734850  | -0.22128207344734 |
| C | -0.78131213540826 | 1.16970235460918  | -0.06002940710196 |
| H | -0.48964144404116 | -0.96800701304085 | -0.00208239366212 |
| H | 1.84851913499835  | -0.97102053494299 | -0.04398065232195 |
| H | 3.13497079487939  | 1.09809497729647  | -0.63151445109800 |
| H | 1.80874298436257  | 3.34093768933971  | -0.35557995149115 |
| H | -0.59611620479980 | 3.28231758970403  | -0.31178218304325 |
| H | -1.85998754401765 | 1.13910178051568  | -0.08035799444499 |
| C | 2.82633558321348  | 1.79385231577796  | 1.53243237346062  |
| C | 3.54414639364823  | 0.70585598653318  | 2.11572290002965  |
| C | 2.77525049515290  | -0.19642729976925 | 2.78991397804047  |
| C | 1.39431528895112  | 0.11568683976071  | 3.01433313463678  |
| C | 0.78415427882259  | 1.30154045491283  | 2.68813335097894  |
| C | 1.51537340348054  | 2.26613319435439  | 1.95927261002071  |
| H | 3.46545578960007  | 2.60366084734349  | 1.18401789770251  |
| H | 4.58240422811957  | 0.53498614939741  | 1.86659429495899  |
| H | 3.17009377771737  | -1.12863143084997 | 3.16981466027833  |
| H | 0.81151928837962  | -0.61057885425348 | 3.57037904601284  |
| H | -0.22678651391698 | 1.49948199647416  | 3.01436946442047  |
| H | 1.32352335774762  | 3.31884194018215  | 2.11400079662865  |

---

Structure name :  $\text{TS}_D(\text{I})$   
Method : NEB-DFT ( $\omega\text{B97X-D3/ma-def2-TZVPP}$ )

24

|   |                   |                   |                   |
|---|-------------------|-------------------|-------------------|
| C | -0.51721208146803 | -1.51686488978709 | -1.42005565939467 |
| C | 0.73460782889479  | -0.99062223805334 | -1.56367044044857 |
| C | 0.92807059883376  | 0.43254194210519  | -1.46870467262915 |
| C | -0.24041098138317 | 1.26792471681802  | -1.53532974034362 |
| C | -1.48068053444165 | 0.71810961279280  | -1.38177213789464 |

---

|   |                   |                   |                   |
|---|-------------------|-------------------|-------------------|
| C | -1.62659791460993 | -0.67316338072253 | -1.22142855702544 |
| H | -0.66022802463714 | -2.58971548719568 | -1.44417244341329 |
| H | 1.58716371882948  | -1.63295235267586 | -1.74146531685160 |
| H | -0.12486615108030 | 2.33439539608350  | -1.67810406076736 |
| H | -2.35740573557881 | 1.35299439802511  | -1.37407724451161 |
| H | -0.70421553625095 | 0.96387627428466  | 1.77749648580986  |
| H | -0.80449468382067 | -0.43002001924943 | 1.95295848586536  |
| C | 0.32420275760487  | -1.24285560058112 | 1.73336459757530  |
| C | 1.45222546736316  | -0.71922138017398 | 1.16956075801596  |
| C | 1.47550182012400  | 0.65783189119856  | 0.75470545302208  |
| C | 0.41581702141555  | 1.51170788308971  | 1.22157687605342  |
| C | -1.68732986270725 | -0.84983182963743 | 2.41758405531711  |
| C | 2.32764758871587  | -1.33601085361805 | 1.01384679904394  |
| H | -2.61550232763301 | -1.10108117125185 | -1.11821018327134 |
| H | 0.50745993503288  | 2.58401128864705  | 1.10916055251352  |
| H | 2.43075575833170  | 1.10643171671549  | 0.51264591574088  |
| H | 0.28826201618720  | -2.29132269697101 | 2.00012567594463  |
| H | -1.52852460586156 | 1.59898785962620  | 2.07598193384624  |
| H | 1.87575392813920  | 0.84484892053108  | -1.79201713219701 |

---

Structure name : Cl<sub>D</sub>(I)

Method : CASSCF(12,11)/6-31G\*\*

24

|   |               |               |               |
|---|---------------|---------------|---------------|
| C | -1.2588150077 | -0.9562743753 | -1.3275134759 |
| C | -0.2898153954 | -1.5477864249 | -0.5822507950 |
| C | 1.0459415608  | -0.9529657676 | -0.4786998367 |
| C | 1.2901221179  | 0.1950899178  | -1.3785311640 |
| C | 0.2472755508  | 0.6946655431  | -2.2126471673 |
| C | -1.0325151696 | 0.2345884522  | -2.1163296321 |
| H | -2.2214502194 | -1.4374229995 | -1.3863068682 |
| H | -0.4790911146 | -2.4783931981 | -0.0811517831 |
| H | 1.8528077451  | -1.6475115319 | -0.3324762004 |
| H | 2.3121976983  | 0.3854957891  | -1.6586147363 |
| H | 0.4788594925  | 1.5232676811  | -2.8619338193 |
| H | -1.8336575640 | 0.6504548152  | -2.6983717098 |
| C | -1.0325788974 | -0.2435703799 | 2.1036916310  |
| C | 0.2465360113  | -0.7060398778 | 2.1993297130  |
| C | 1.2886431653  | -0.1993934481 | 1.3684120729  |
| C | 1.0298812773  | 0.9712473240  | 0.4993111779  |
| C | -0.2964448768 | 1.5544815767  | 0.5971472669  |
| C | -1.2532018811 | 0.9572398989  | 1.3309150817  |
| H | -1.8383824413 | -0.6650283658 | 2.6742211410  |
| H | 0.4734551665  | -1.5421090736 | 2.8400069709  |
| H | 2.3105779811  | -0.3714726788 | 1.6599105469  |
| H | 1.8378959976  | 1.6571516287  | 0.3295593548  |
| H | -0.4949178943 | 2.4801285375  | 0.0915390015  |
| H | -2.2198881751 | 1.4301573610  | 1.3898366746  |

---

Structure name :  $\text{Cl}_D(\text{II})$   
Method : CASSCF(12,11)/6-31G\*\*

24

|   |               |               |               |
|---|---------------|---------------|---------------|
| C | -0.3165472354 | -1.1776541971 | -2.5020904796 |
| C | 0.8444495090  | -1.0490355039 | -1.6500466485 |
| C | 0.8557189543  | 0.0050114516  | -0.5869070923 |
| C | 0.8415837403  | 1.0517647613  | -1.6497437492 |
| C | -0.3127323057 | 1.1745465975  | -2.5101639667 |
| C | -0.9865451800 | -0.0033472547 | -2.8587719550 |
| H | -0.5956624160 | -2.1368183419 | -2.9009659748 |
| H | 1.7016203226  | -1.6824932877 | -1.7910310192 |
| H | 1.7035664557  | 1.6759595261  | -1.8039131649 |
| H | -0.5746631450 | 2.1270149231  | -2.9357341724 |
| H | -0.2764470530 | -0.0003867480 | 0.4657154464  |
| H | -0.2127832589 | -1.2512564779 | 1.3077032477  |
| C | -0.0997419734 | -1.2279671046 | 2.6680921675  |
| C | -0.0414805855 | 0.0007033438  | 3.3877646410  |
| C | -0.1050293706 | 1.2283608671  | 2.6682506652  |
| C | -0.2193798720 | 1.2506711095  | 1.3074793784  |
| C | -0.2561238994 | -2.1936269646 | 0.7898533442  |
| C | 0.0493428786  | 0.0008575245  | 4.4579953845  |
| H | -1.8865055197 | -0.0042522324 | -3.4455737155 |
| H | -0.2656978431 | 2.1926641815  | 0.7891772153  |
| H | -0.0638273457 | 2.1562687488  | 3.2130038985  |
| H | -0.0551793999 | -2.1554417405 | 3.2133229863  |
| H | -1.2203035196 | -0.0032520285 | -0.0781700862 |
| H | 1.8082296004  | 0.0063075263  | -0.0713910447 |



**L2: Molecular orbitals for  $\text{Cl}_D(\text{I})$ :**

## Occupied orbitals

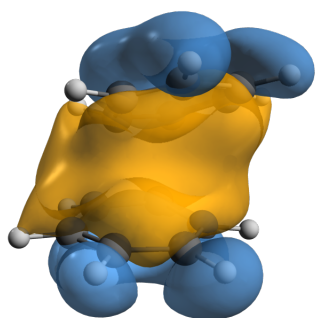

MO: 33

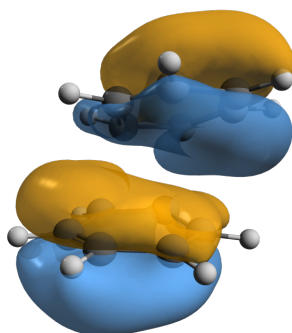

MO: 38

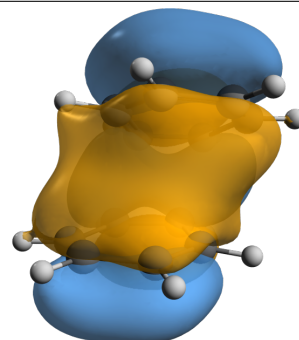

MO: 39

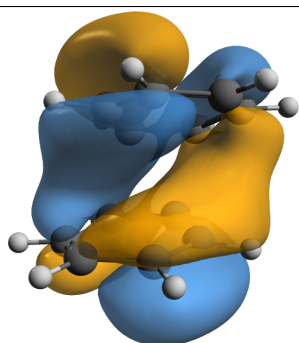

MO: 40

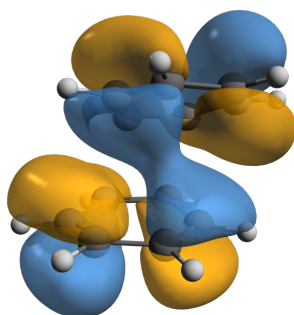

MO: 41

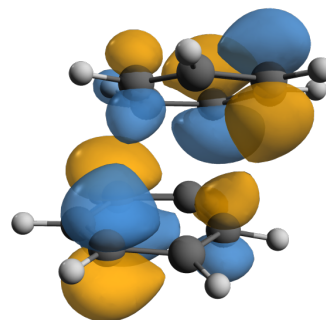

MO: 42

## Virtual orbitals

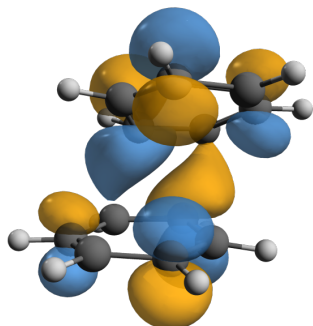

MO: 43

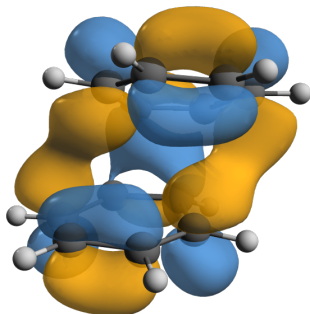

MO: 44

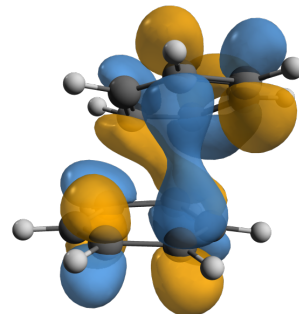

MO: 45

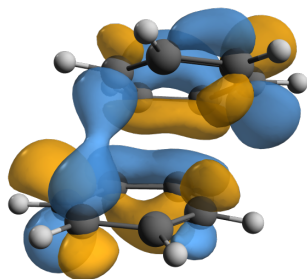

MO: 47

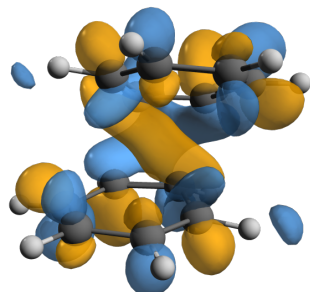

MO: 60

**L3: Molecular orbitals for  $\text{Cl}_D(\text{II})$ :**

## Occupied orbitals

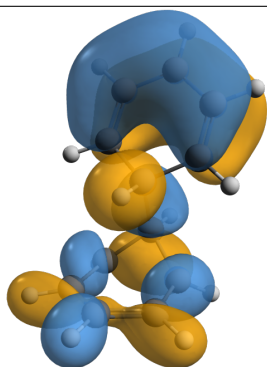

MO: 36

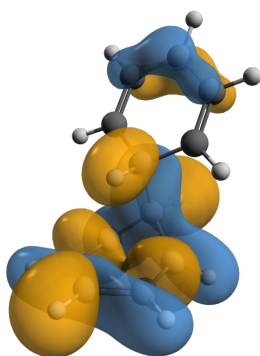

MO: 38

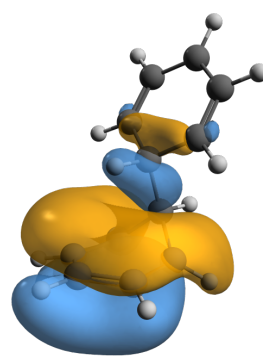

MO: 39

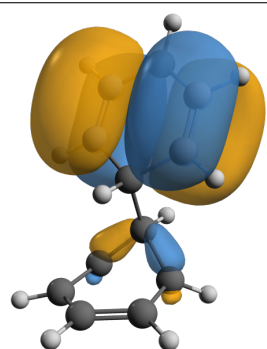

MO: 40

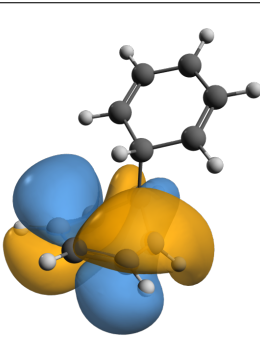

MO: 41

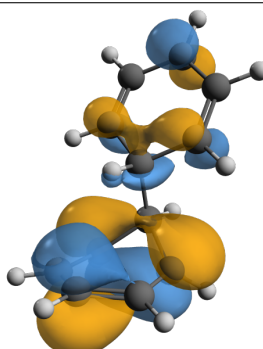

MO: 42

## Virtual orbitals

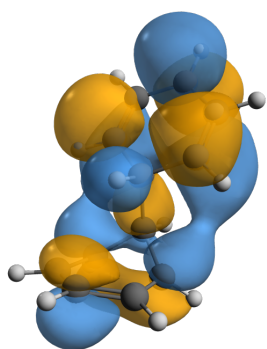

MO: 43

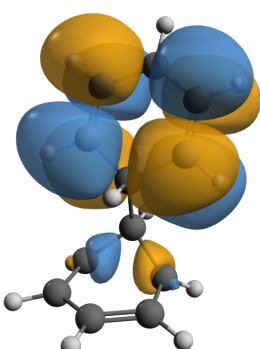

MO: 44

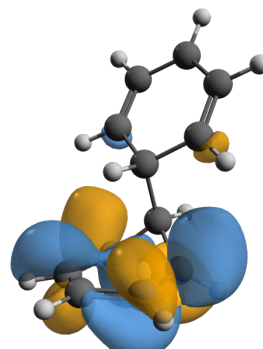

MO: 46

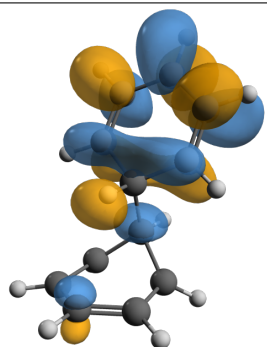

MO: 47

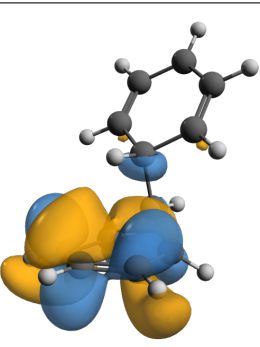

MO: 51

**Table S1.** The bond lengths between the carbon atoms (in Å) of the half-boat geometry configurations computed for different conical intersection (CI) geometries at SF-TDDFT/ $\omega$ B97X-D3/ma-def2-TZVPP level of theory.

| Geom.                | Benzene half-boat monomer's C-C bonds |                                |                                |                                |                                |                                |                                |
|----------------------|---------------------------------------|--------------------------------|--------------------------------|--------------------------------|--------------------------------|--------------------------------|--------------------------------|
|                      | C <sub>1</sub> –C <sub>2</sub>        | C <sub>2</sub> –C <sub>3</sub> | C <sub>3</sub> –C <sub>4</sub> | C <sub>4</sub> –C <sub>5</sub> | C <sub>5</sub> –C <sub>6</sub> | C <sub>1</sub> –C <sub>6</sub> | C <sub>2</sub> –C <sub>4</sub> |
| Mon.                 | 1.452                                 | 1.443                          | 1.443                          | 1.452                          | 1.381                          | 1.381                          | 1.789                          |
| CI <sub>M</sub> (I)  | 1.454                                 | 1.440                          | 1.440                          | 1.454                          | 1.381                          | 1.381                          | 1.791                          |
| CI <sub>M</sub> (II) | 1.458                                 | 1.437                          | 1.440                          | 1.451                          | 1.384                          | 1.378                          | 1.791                          |
